# Supplementary material for: PhCHS5 and PhF3′5′H Genes Over-Expression in Petunia (Petunia hybrida) and Phalaenopsis (Phalaenopsis aphrodite) Regulate Flower Color and Branch Number
Source: MDPI journal article supplement (doi:10.3390/plants12112204), 2023-06-02
Supplement: s1 [file s1]

## Supplementary File

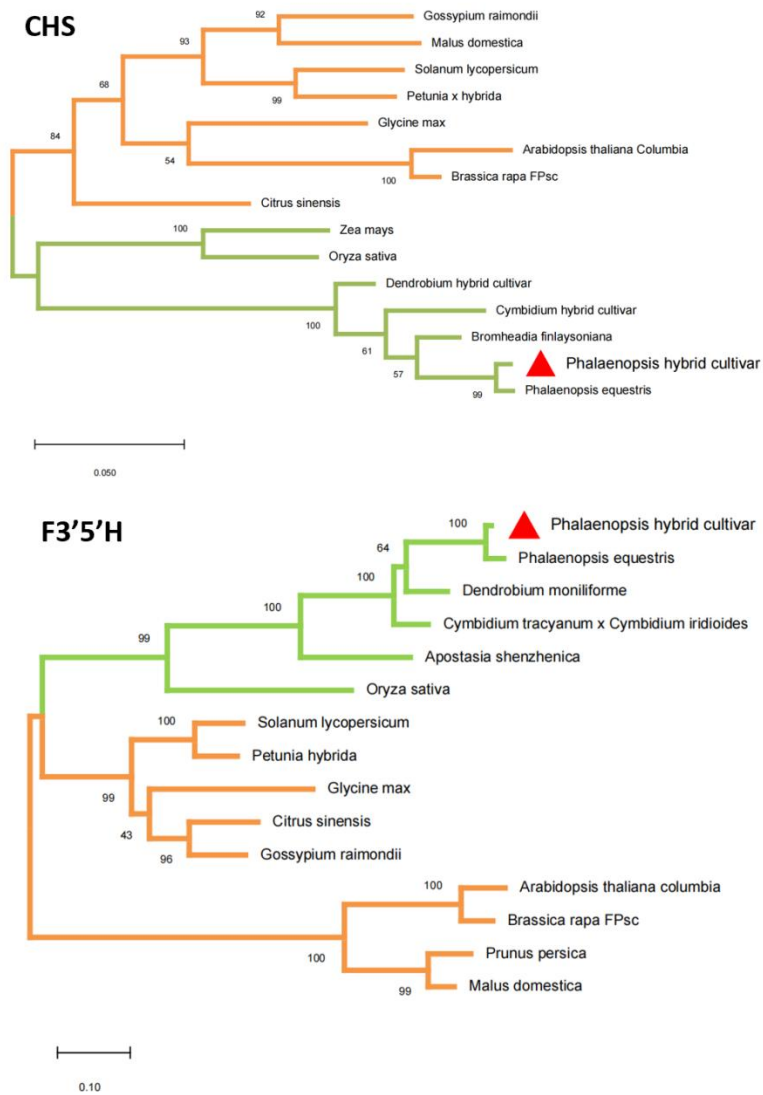

**Fig. S1** Phylogenetic analysis of CHS5 and F3'5'H in different plant species. (a) CHS5; (b) F3'5'H.

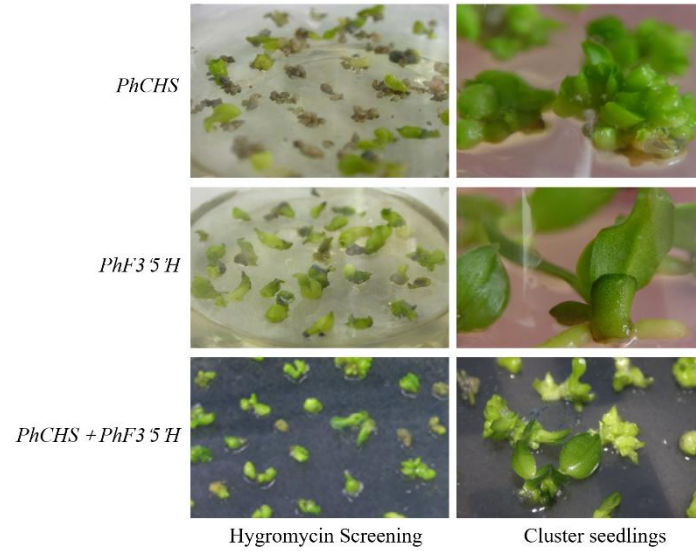

Fig. S2 Hygromycin screening and cluster seedlings of the transgenic *Phalaenopsis* samples.

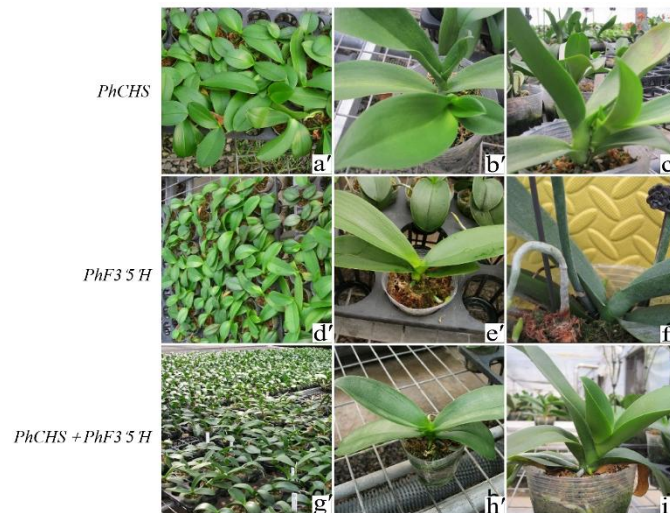

Fig. S3 Leaf phenotypes of the transgenic *Phalaenopsis* samples. (a'–c') *PhCHS5*-transformed plants. (d'–f') *PhF3'5'H*-transformed plants. (g'–i') *PhCHS5* + *PhF3'5'H*-transformed plants.

Table S1 Medium information for protocorm-likebodies (PLB) induction and differentiation and *Agrobacterium* infection

| Name | function       | medium gradients                                                                | notes                     |
|------|----------------|---------------------------------------------------------------------------------|---------------------------|
| YD1  | PLBs induction | MS 4.4g/L+ BA(ppm)/NAA(ppm)<br>2.0/0.2+ 20g/L sucrose+CH 500mg/L<br>+AC 50mg/ml | active carbon (AC)        |
| YD 2 | PLBs induction | MS 4.4g/L+ BA(ppm)/NAA(ppm)<br>2.0/2.0+ 20g/L sucrose+CH 500mg/L<br>+AC 50mg/ml | casein<br>hydrolysate(CH) |
| YD 3 | PLBs induction | MS 4.4g/L+ BA(ppm)/NAA(ppm)<br>3.0/0.1+ 20g/L sucrose+CH 500mg/L<br>+AC 50mg/ml | solid medium with         |

|      |                                                                            |                                                                                 |                                |                     |
|------|----------------------------------------------------------------------------|---------------------------------------------------------------------------------|--------------------------------|---------------------|
| YD4  | PLBs induction                                                             | MS 4.4g/L+ BA(ppm)/NAA(ppm)<br>3.0/2.0+ 20g/L sucrose+CH 500mg/L<br>+AC 50mg/ml | phytagel<br>pH=6.2             | 2.7g/L              |
| YDR  | PLBs Rooting                                                               | MS 2.2g/L +IBA(0.1mg/ml)+sucrose<br>30g/L+CH 500mg/L + AC (50mg/ml)             |                                |                     |
| YD3T | transformation<br>medium solution for<br><i>Agrobacterium</i><br>infection | MS 4.4g/L+ BA(ppm)/NAA(ppm)<br>3.0/0.1+ 20g/L sucrose+CH 500mg/L<br>+AC 50mg/ml | Without<br>and AC ,<br>100mg/l | phytagel<br>with As |
